# Supplementary material for: Spatio-temporal variation in bird assemblages is associated with fluctuations in temperature and precipitation along a tropical elevational gradient
Source: PLOS journal article supplement (doi:10.1371/journal.pone.0196179), 2018-05-10
Supplement: S2 (10.1371/journal.pone.0196179.s002) [file journal.pone.0196179.s002.pdf]

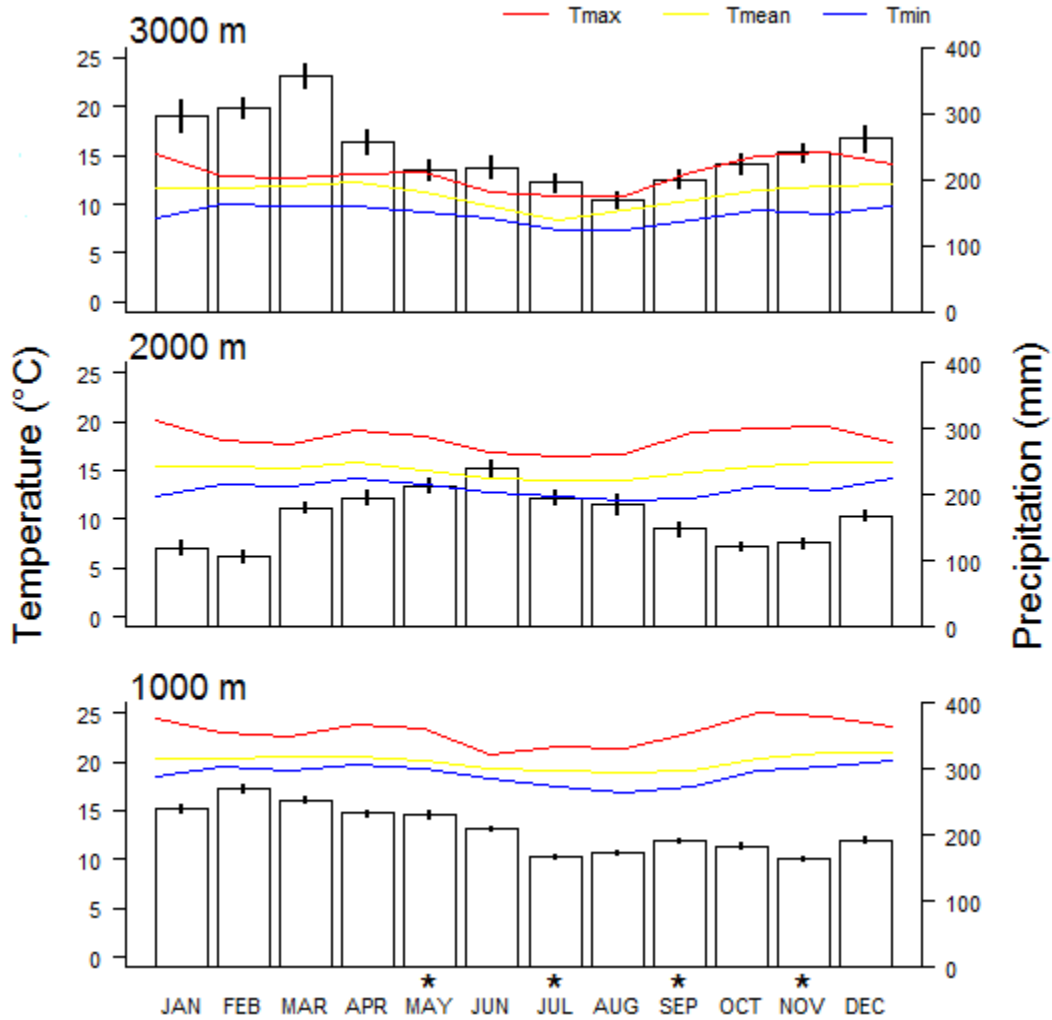

**S2 Fig.** Mean monthly temperature (i.e., monthly mean of daily minimum [blue], mean [yellow] and maximum [maximum] temperatures) and precipitation (i.e., average of the sum of monthly precipitation) over all six study plots located at 1000, 2000 and 3000 m a.s.l. Sampling months are indicated by an asterisk.
