# Supplementary material for: Spatio-temporal variation in bird assemblages is associated with fluctuations in temperature and precipitation along a tropical elevational gradient
Source: PLOS journal article supplement (doi:10.1371/journal.pone.0196179), 2018-05-10
Supplement: S5 (10.1371/journal.pone.0196179.s005) [file journal.pone.0196179.s005.pdf]

**S1 Table.** Akaike's information criterion (AIC) of generalized linear mixed effect models testing main and interaction effects of elevation and season on bird a) abundance, b) evenness, c) species richness. Species richness model in d) also includes abundance as a fixed effect. Study plot nested in site and sampling month of each year were included as random effects in all models. All models assume a Poisson error distribution.

|                          | <b>Predictor variables</b>     | <b>AIC</b> | <b><math>\Delta</math>AIC</b> |
|--------------------------|--------------------------------|------------|-------------------------------|
| <b>a) Bird abundance</b> | Season + elevation             | 1391       |                               |
|                          | Season x elevation             | 1390       | 1                             |
| <b>b) Bird evenness</b>  | Season + elevation             | -283       |                               |
|                          | Season x elevation             | -279       | 4                             |
| <b>c) Bird richness</b>  | Season + elevation             | 927        |                               |
|                          | Season x elevation             | 930        | 3                             |
| <b>d) Bird richness</b>  | Abundance + season + elevation | 833        |                               |
|                          | Abundance + season x elevation | 837        | 4                             |
