# Supplementary material for: Spatio-temporal variation in bird assemblages is associated with fluctuations in temperature and precipitation along a tropical elevational gradient
Source: PLOS journal article supplement (doi:10.1371/journal.pone.0196179), 2018-05-10
Supplement: S6 (10.1371/journal.pone.0196179.s006) [file journal.pone.0196179.s006.pdf]

**S2 Table.** List of 241 bird species recorded and their feeding guilds (60% or more of a food type) based on the Elton trait database, at three elevations (1000, 2000 and 3000 m) in and around Podocarpus National Park and San Francisco reserve in southern Ecuador.

|                                  | Nectarivores | Frugivores | Insectivores | Omnivores |
|----------------------------------|--------------|------------|--------------|-----------|
| <b>1000</b>                      |              |            |              |           |
| <b>Tinamiformes</b>              |              |            |              |           |
| <i>Crypturellus soui</i>         |              |            |              | X         |
| <i>Tinamus tao</i>               |              |            |              | X         |
| <b>Galliformes</b>               |              |            |              |           |
| <i>Aburria aburri</i>            |              | X          |              |           |
| <i>Chamaepetes goudotii</i>      |              | X          |              |           |
| <i>Odontophorus speciosus</i>    |              |            |              | X         |
| <i>Ortalis guttata</i>           |              | X          |              |           |
| <b>Columbiformes</b>             |              |            |              |           |
| <i>Columba plumbea</i>           |              |            |              | X         |
| <i>Columba subvinacea</i>        |              | X          |              |           |
| <i>Geotrygon frenata</i>         |              |            |              | X         |
| <i>Leptotila rufaxilla</i>       |              | X          |              |           |
| <b>Psittaciformes</b>            |              |            |              |           |
| <i>Pyrrhura albipectus</i>       |              | X          |              |           |
| <b>Cuculiformes</b>              |              |            |              |           |
| <i>Crotophaga ani</i>            |              |            |              | X         |
| <i>Piaya cayana</i>              |              |            | X            |           |
| <b>Apodiformes</b>               |              |            |              |           |
| <i>Agelaiocercus kingi</i>       | X            |            |              |           |
| <i>Amazilia fimbriata</i>        | X            |            |              |           |
| <i>Chrysuronia oenone</i>        | X            |            |              |           |
| <i>Colibri coruscans</i>         | X            |            |              |           |
| <i>Doryfera ludovicae</i>        | X            |            |              |           |
| <i>Eutoxeres aquila</i>          | X            |            |              |           |
| <i>Heliodoxa leadbeateri</i>     | X            |            |              |           |
| <i>Heliothryx aurita</i>         | X            |            |              |           |
| <i>Klais guimeti</i>             | X            |            |              |           |
| <i>Ocreatus underwoodii</i>      | X            |            |              |           |
| <i>Phaethornis griseogularis</i> | X            |            |              |           |
| <i>Phaethornis guy</i>           | X            |            |              |           |
| <i>Phaethornis syrmatophorus</i> | X            |            |              |           |
| <i>Thalurania furcata</i>        | X            |            |              |           |

**Trogoniformes**

*Trogon collaris* X

**Coraciiformes**

*Momotus aequatorialis* X

**Piciformes**

*Aulacorhynchus derbianus* X

*Dryocopus lineatus* X

*Eubucco bourcierii* X

*Galbula pastazae* X

*Malacoptila fulvogularis* X

*Piculus rubiginosus* X

*Picumus lafresnayi* X

*Veniliornis passerinus* X

**Passeriformes**

*Ammodramus aurifrons* X

*Ampelioides tschudii* X

*Anabacerthia striaticollis* X

*Arremon aurantirostris* X

*Basileuterus fulvicauda* X

*Cacicus uropygialis* X

*Campylorhamphus pusillus* X

*Catharus ustulatus* X

*Cephalopterus ornatus* X

*Cercomacra nigrescens* X

*Chamaeza campanisona* X

*Chlorochrysa calliparaea* X

*Chlorophanes spiza* X

*Chlorospingus canigularis* X

*Chlorospingus flavigularis* X

*Cissopis leveriana* X

*Coereba flaveola* X

*Colonia colonus* X

*Conopias cinchoneti* X

*Coryphospingus cucullatus* X

*Cyanocorax violaceus* X

*Cyanocorax yncas* X

*Dacnis cayana* X

*Dacnis lineata* X

*Dendrocincla fuliginosa* X

*Dixiphia pipra* X

*Dysithamnus mentalis* X

Spatio-temporal dynamics in bird assemblages

|                                   |   |   |   |
|-----------------------------------|---|---|---|
| <i>Euphonia xanthogaster</i>      | X |   |   |
| <i>Glyphorynchus spirurus</i>     |   | X |   |
| <i>Grallaria haplonota</i>        |   | X |   |
| <i>Hemithraupis guira</i>         |   | X |   |
| <i>Henicorhina leucosticta</i>    |   | X |   |
| <i>Herpsilochmus axillaris</i>    |   | X |   |
| <i>Hylophilus olivaceus</i>       |   | X |   |
| <i>Hylophylax poecilinota</i>     |   | X |   |
| <i>Hypocnemis cantator</i>        |   | X |   |
| <i>Iridophanes pulcherrima</i>    | X |   |   |
| <i>Lepidothrix isidorei</i>       | X |   |   |
| <i>Leptopogon rufipectus</i>      |   | X |   |
| <i>Leptopogon superciliaris</i>   |   | X |   |
| <i>Lochmias nematura</i>          |   | X |   |
| <i>Machaeropterus striolatus</i>  | X |   |   |
| <i>Mionectes oleagineus</i>       | X |   |   |
| <i>Mionectes olivaceus</i>        | X |   |   |
| <i>Mionectes striaticollis</i>    |   |   | X |
| <i>Myadestes ralloides</i>        |   |   | X |
| <i>Myiarchus cephalotes</i>       |   | X |   |
| <i>Myiarchus ferox</i>            |   |   | X |
| <i>Myioborus miniatus</i>         |   | X |   |
| <i>Myiotriccus ornatus</i>        |   | X |   |
| <i>Myiozetetes similis</i>        |   |   | X |
| <i>Odontorchilus branickii</i>    |   | X |   |
| <i>Parula pitiayumi</i>           |   | X |   |
| <i>Phyllomyias plumbeiceps</i>    |   |   | X |
| <i>Pipra erythrocephala</i>       | X |   |   |
| <i>Pipreola chlorolepidota</i>    | X |   |   |
| <i>Piranga leucoptera</i>         |   |   | X |
| <i>Platycichla leucops</i>        | X |   |   |
| <i>Platyrinchus mystaceus</i>     |   | X |   |
| <i>Pogonotriccus ophthalmicus</i> |   | X |   |
| <i>Pogonotriccus poecilotis</i>   |   | X |   |
| <i>Psarocolius angustifrons</i>   |   |   | X |
| <i>Psarocolius decumanus</i>      |   |   | X |
| <i>Rupicola peruviana</i>         | X |   |   |
| <i>Saltator grossus</i>           |   | X |   |
| <i>Saltator maximus</i>           |   | X |   |
| <i>Sittasomus griseicapillus</i>  |   | X |   |
| <i>Syndactyla subalaris</i>       |   | X |   |

Spatio-temporal dynamics in bird assemblages

|                                   |   |   |   |   |
|-----------------------------------|---|---|---|---|
| <i>Tachyphonus cristatus</i>      |   |   |   | X |
| <i>Tangara arthus</i>             | X |   |   |   |
| <i>Tangara chilensis</i>          | X |   |   |   |
| <i>Tangara chrysotis</i>          | X |   |   |   |
| <i>Tangara cyanicollis</i>        | X |   |   |   |
| <i>Tangara gyrola</i>             | X |   |   |   |
| <i>Tangara nigrocincta</i>        | X |   |   |   |
| <i>Tangara punctata</i>           | X |   |   |   |
| <i>Tangara schrankii</i>          | X |   |   |   |
| <i>Tangara xanthogastra</i>       |   |   |   | X |
| <i>Thraupis episcopus</i>         |   |   |   | X |
| <i>Thraupis palmarum</i>          | X |   |   |   |
| <i>Todirostrum cinereum</i>       |   |   | X |   |
| <i>Tolmomyias viridiceps</i>      |   |   | X |   |
| <i>Troglodytes aedon</i>          |   |   | X |   |
| <i>Turdus albicollis</i>          |   |   | X |   |
| <i>Turdus fulviventris</i>        | X |   |   |   |
| <i>Turdus nigriceps</i>           | X |   |   |   |
| <i>Tyrannus melancholicus</i>     |   |   | X |   |
| <i>Wilsonia canadensis</i>        |   |   | X |   |
| <i>Xenops minutus</i>             |   |   | X |   |
| <i>Xiphorhynchus triangularis</i> |   |   | X |   |
| <hr/>                             |   |   |   |   |
| <b>2000</b>                       |   |   |   |   |
| <hr/>                             |   |   |   |   |
| <b>Tinamiformes</b>               |   |   |   |   |
| <i>Nothocercus bonapartei</i>     |   |   |   | X |
| <b>Galliformes</b>                |   |   |   |   |
| <i>Chamaepetes goudotii</i>       | X |   |   |   |
| <i>Odontophorus speciosus</i>     |   |   |   | X |
| <i>Penelope barbata</i>           | X |   |   |   |
| <b>Columbiformes</b>              |   |   |   |   |
| <i>Columba fasciata</i>           | X |   |   |   |
| <i>Geotrygon frenata</i>          |   |   |   | X |
| <b>Coraciiformes</b>              |   |   |   |   |
| <i>Momotus aequatorialis</i>      |   |   | X |   |
| <b>Psittaciformes</b>             |   |   |   |   |
| <i>Amazona mercenaria</i>         | X |   |   |   |
| <i>Touit stictoptera</i>          |   |   |   | X |
| <b>Apodiformes</b>                |   |   |   |   |
| <i>Adelomyia melanogenys</i>      |   | X |   |   |
| <i>Aglaiocercus kingi</i>         |   | X |   |   |
| <i>Chalcostigma ruficeps</i>      |   | X |   |   |

Spatio-temporal dynamics in bird assemblages

|                                    |   |   |   |
|------------------------------------|---|---|---|
| <i>Coeligena coeligena</i>         | X |   |   |
| <i>Coeligena torquata</i>          | X |   |   |
| <i>Colibri coruscans</i>           | X |   |   |
| <i>Colibri thalassinus</i>         | X |   |   |
| <i>Doryfera johannae</i>           | X |   |   |
| <i>Doryfera ludovicae</i>          | X |   |   |
| <i>Heliangelus amethysticollis</i> | X |   |   |
| <i>Heliodoxa leadbeateri</i>       | X |   |   |
| <i>Heliodoxa rubinoides</i>        | X |   |   |
| <i>Metallura tyrianthina</i>       | X |   |   |
| <i>Ocreatus underwoodii</i>        | X |   |   |
| <i>Phaethornis syrmatophorus</i>   | X |   |   |
| <b>Trogoniformes</b>               |   |   |   |
| <i>Pharomachrus auriceps</i>       |   | X |   |
| <i>Trogon personatus</i>           |   |   | X |
| <b>Piciformes</b>                  |   |   |   |
| <i>Aulacorhynchus prasinus</i>     |   |   | X |
| <i>Campephilus pollens</i>         |   | X |   |
| <i>Piculus rivolii</i>             |   | X |   |
| <b>Passeriformes</b>               |   |   |   |
| <i>Anairetes parulus</i>           |   | X |   |
| <i>Anisognathus lacrymosus</i>     | X |   |   |
| <i>Anisognathus somptuosus</i>     |   |   | X |
| <i>Atlapetes latinuchus</i>        |   |   | X |
| <i>Basileuterus coronatus</i>      |   | X |   |
| <i>Basileuterus nigrocristatus</i> |   | X |   |
| <i>Basileuterus tristriatus</i>    |   | X |   |
| <i>Buarremon brunneinuchus</i>     |   |   | X |
| <i>Buarremon torquatus</i>         |   |   | X |
| <i>Cacicus uropygialis</i>         |   | X |   |
| <i>Chlorospingus canigularis</i>   |   |   | X |
| <i>Chlorospingus flavigularis</i>  | X |   |   |
| <i>Chlorospingus ophthalmicus</i>  |   | X |   |
| <i>Contopus fumigatus</i>          |   | X |   |
| <i>Creurgops verticalis</i>        |   | X |   |
| <i>Cyanocorax yncas</i>            |   |   | X |
| <i>Cyclarhis gujanensis</i>        |   | X |   |
| <i>Dendroica fusca</i>             |   | X |   |
| <i>Diglossa albilatera</i>         |   |   | X |
| <i>Diglossa humeralis</i>          |   |   | X |
| <i>Diglossopsis cyanea</i>         |   | X |   |

Spatio-temporal dynamics in bird assemblages

|                                    |   |   |   |
|------------------------------------|---|---|---|
| <i>Drymophila caudata</i>          |   | X |   |
| <i>Elaenia albiceps</i>            |   |   | X |
| <i>Elaenia pallatangae</i>         |   |   | X |
| <i>Grallaria ruficapilla</i>       |   | X |   |
| <i>Grallaricula flavirostris</i>   |   | X |   |
| <i>Hemispingus frontalis</i>       |   | X |   |
| <i>Henicorhina leucophrys</i>      |   | X |   |
| <i>Iridosornis analis</i>          |   |   | X |
| <i>Lepidocolaptes lacrymiger</i>   |   | X |   |
| <i>Leptopogon rufipectus</i>       |   | X |   |
| <i>Lochmias nematura</i>           |   | X |   |
| <i>Mecocerculus calopterus</i>     |   | X |   |
| <i>Mionectes olivaceus</i>         | X |   |   |
| <i>Mionectes striaticollis</i>     |   |   | X |
| <i>Myadestes ralloides</i>         |   |   | X |
| <i>Myiarchus cephalotes</i>        |   | X |   |
| <i>Myiarchus tuberculifer</i>      |   | X |   |
| <i>Myioborus miniatus</i>          |   | X |   |
| <i>Ochthoeca cinnamomeiventris</i> |   | X |   |
| <i>Phyllomyias nigrocapillus</i>   |   | X |   |
| <i>Pipraeidea melanonota</i>       |   |   | X |
| <i>Pipreola riefferii</i>          | X |   |   |
| <i>Poecilotriccus ruficeps</i>     |   | X |   |
| <i>Pogonotriccus ophthalmicus</i>  |   | X |   |
| <i>Pogonotriccus poecilotis</i>    |   | X |   |
| <i>Pyrrhomyias cinnamomea</i>      |   | X |   |
| <i>Rupicola peruviana</i>          | X |   |   |
| <i>Scytalopus latrans</i>          |   | X |   |
| <i>Scytalopus micropterus</i>      |   | X |   |
| <i>Sericossypha albocristata</i>   |   | X |   |
| <i>Synallaxis azarae</i>           |   | X |   |
| <i>Tangara cyanicollis</i>         | X |   |   |
| <i>Tangara labradorides</i>        |   | X |   |
| <i>Tangara nigroviridis</i>        |   | X |   |
| <i>Tangara parzudakii</i>          | X |   |   |
| <i>Tangara vassorii</i>            | X |   |   |
| <i>Tangara xanthocephala</i>       | X |   |   |
| <i>Thamnophilus unicolor</i>       |   | X |   |
| <i>Thraupis cyanocephala</i>       | X |   |   |
| <i>Thraupis palmarum</i>           | X |   |   |
| <i>Thryothorus euophrys</i>        |   | X |   |

|                                        |   |   |   |
|----------------------------------------|---|---|---|
| <i>Troglodytes solstitialis</i>        |   | X |   |
| <i>Turdus fuscater</i>                 |   |   | X |
| <i>Turdus serranus</i>                 | X |   |   |
| <i>Vireo leucophrys</i>                |   | X |   |
| <i>Wilsonia canadensis</i>             |   | X |   |
| <i>Xiphocolaptes promeropirhynchus</i> |   | X |   |
| <i>Xiphorhynchus triangularis</i>      |   | X |   |
| <i>Zimmerius chrysops</i>              |   | X |   |
| <i>Zonotrichia capensis</i>            |   |   | X |
| <hr/>                                  |   |   |   |
| <b>3000</b>                            |   |   |   |
| <hr/>                                  |   |   |   |
| <b>Galliformes</b>                     |   |   |   |
| <i>Penelope barbata</i>                | X |   |   |
| <b>Columbiformes</b>                   |   |   |   |
| <i>Columba fasciata</i>                | X |   |   |
| <b>Apodiformes</b>                     |   |   |   |
| <i>Adelomyia melanogenys</i>           | X |   |   |
| <i>Aglaeactis cupripennis</i>          | X |   |   |
| <i>Boissonneaua matthewsii</i>         | X |   |   |
| <i>Chalcostigma herrani</i>            | X |   |   |
| <i>Coeligena iris</i>                  | X |   |   |
| <i>Coeligena lutetiae</i>              | X |   |   |
| <i>Coeligena torquata</i>              | X |   |   |
| <i>Eriocnemis vestitus</i>             | X |   |   |
| <i>Heliangelus viola</i>               | X |   |   |
| <i>Lafresnaya lafresnayi</i>           | X |   |   |
| <i>Metallura odomae</i>                | X |   |   |
| <i>Metallura tyrianthina</i>           | X |   |   |
| <i>Pterophanes cyanopterus</i>         | X |   |   |
| <b>Piciformes</b>                      |   |   |   |
| <i>Aulacorhynchus prasinus</i>         |   |   | X |
| <i>Piculus rivolii</i>                 |   | X |   |
| <b>Passeriformes</b>                   |   |   |   |
| <i>Amblycercus holosericeus</i>        |   | X |   |
| <i>Ampelion rubrocristatus</i>         | X |   |   |
| <i>Anairetes parulus</i>               |   | X |   |
| <i>Anisognathus igniventris</i>        |   |   | X |
| <i>Anisognathus lacrymosus</i>         | X |   |   |
| <i>Atlapetes latinuchus</i>            |   |   | X |
| <i>Atlapetes pallidinucha</i>          |   |   | X |
| <i>Basileuterus coronatus</i>          |   | X |   |
| <i>Basileuterus nigrocristatus</i>     |   | X |   |

Spatio-temporal dynamics in bird assemblages

|                                      |   |   |   |
|--------------------------------------|---|---|---|
| <i>Buarremon torquatus</i>           |   |   | X |
| <i>Buthraupis montana</i>            | X |   |   |
| <i>Catamblyrhynchus diadema</i>      |   | X |   |
| <i>Catamenia homochroa</i>           |   |   | X |
| <i>Chlorornis riefferii</i>          |   |   | X |
| <i>Cinnycerthia unirufa</i>          |   | X |   |
| <i>Cnemoscopus rubrirostris</i>      |   | X |   |
| <i>Conirostrum albifrons</i>         |   | X |   |
| <i>Conirostrum cinereum</i>          |   |   | X |
| <i>Conirostrum sitticolor</i>        |   |   | X |
| <i>Cyanolyca turcosa</i>             |   | X |   |
| <i>Diglossa albilatera</i>           |   |   | X |
| <i>Diglossa humeralis</i>            |   |   | X |
| <i>Diglossa lafresnayii</i>          |   |   | X |
| <i>Diglossopsis cyanea</i>           |   | X |   |
| <i>Dubusia taeniata</i>              |   |   | X |
| <i>Elaenia albiceps</i>              |   |   | X |
| <i>Elaenia pallatangae</i>           |   |   | X |
| <i>Grallaria nuchalis</i>            |   | X |   |
| <i>Grallaria ruficapilla</i>         |   | X |   |
| <i>Grallaria rufula</i>              |   | X |   |
| <i>Grallaria squamigera</i>          |   | X |   |
| <i>Grallaricula nana</i>             |   | X |   |
| <i>Hellmayrea gularis</i>            |   | X |   |
| <i>Hemispingus superciliaris</i>     |   | X |   |
| <i>Hemispingus verticalis</i>        |   | X |   |
| <i>Iridosornis rufivertex</i>        |   |   | X |
| <i>Margarornis squamiger</i>         |   | X |   |
| <i>Mecocerculus stictopterus</i>     |   | X |   |
| <i>Myioborus melanocephalus</i>      |   | X |   |
| <i>Ochthoeca rufipectoralis</i>      |   | X |   |
| <i>Pheucticus chrysogaster</i>       |   |   | X |
| <i>Phyllomyias nigrocapillus</i>     |   | X |   |
| <i>Pipreola arcuata</i>              | X |   |   |
| <i>Pseudocolaptes boissonneautii</i> |   | X |   |
| <i>Scytalopus latrans</i>            |   | X |   |
| <i>Scytalopus parkeri</i>            |   | X |   |
| <i>Synallaxis azarae</i>             |   | X |   |
| <i>Tangara vassorii</i>              | X |   |   |
| <i>Thraupis cyanocephala</i>         | X |   |   |
| <i>Thryothorus euophrys</i>          |   | X |   |



Spatio-temporal dynamics in bird assemblages

|                                 |   |   |
|---------------------------------|---|---|
| <i>Troglodytes solstitialis</i> | X |   |
| <i>Turdus fuscater</i>          |   | X |
| <i>Zonotrichia capensis</i>     |   | X |

---
