# Supplementary material for: Spatio-temporal variation in bird assemblages is associated with fluctuations in temperature and precipitation along a tropical elevational gradient
Source: PLOS journal article supplement (doi:10.1371/journal.pone.0196179), 2018-05-10
Supplement: S7 (10.1371/journal.pone.0196179.s007) [file journal.pone.0196179.s007.pdf]

**S3 Table.** Variance and standard deviation (SD) of the random effects in the models testing the effect of elevation and season on bird a) abundance, b) evenness and c) species richness. Species richness model in d) also includes abundance as a fixed effect. See Table 2 in the main manuscript for model estimates of fixed effects.

|              | Random effect  | Variance | SD   |
|--------------|----------------|----------|------|
| a) Abundance | Plot : site    | 0.08     | 0.27 |
|              | Site           | 0.02     | 0.14 |
|              | Sampling month | 0.03     | 0.17 |
| b) Evenness  | Plot : site    | <0.01    | 0.02 |
|              | Site           | 0.00     | 0.00 |
|              | Sampling month | 0.00     | 0.00 |
| c) Richness  | Plot : site    | 0.03     | 0.18 |
|              | Site           | <0.01    | 0.05 |
|              | Sampling month | 0.01     | 0.11 |
| d) Richness* | Plot : site    | 0.01     | 0.09 |
|              | Site           | 0.00     | 0.00 |
|              | Sampling month | 0.00     | 0.00 |
