# Supplementary material for: Spatio-temporal variation in bird assemblages is associated with fluctuations in temperature and precipitation along a tropical elevational gradient
Source: PLOS journal article supplement (doi:10.1371/journal.pone.0196179), 2018-05-10
Supplement: S8 (10.1371/journal.pone.0196179.s008) [file journal.pone.0196179.s008.pdf]

**S4 Table.** Variance and standard deviation (SD) of the random effects in the models testing the effects of temperature, precipitation and resource availability on eight temporal replicate counts in a) bird abundance b) evenness and c) species richness at three elevations. See Table 3 in the main manuscript for model estimates of fixed effects.

| a) Bird abundance    | Random effect     |               | Variance | SD    |
|----------------------|-------------------|---------------|----------|-------|
| Temperature 3000 m   | Plot: temperature | Intercept     | 0.34     | 0.58  |
|                      |                   | Temperature   | 0.10     | 0.32  |
| Temperature 2000 m   | Plot: temperature | Intercept     | 0.07     | 0.26  |
|                      |                   | Temperature   | 0.33     | 0.58  |
| Temperature 1000 m   | Plot: temperature | Intercept     | 0.17     | 0.41  |
|                      |                   | Temperature   | 0.22     | 0.47  |
| Precipitation 3000 m | Plot: temperature | Intercept     | 0.25     | 0.50  |
|                      |                   | Precipitation | 0.02     | 0.14  |
| Precipitation 2000 m | Plot: temperature | Intercept     | 0.04     | 0.20  |
|                      |                   | Precipitation | 0.01     | 0.11  |
| Precipitation 1000 m | Plot: temperature | Intercept     | 0.03     | 0.17  |
|                      |                   | Precipitation | 0.01     | 0.09  |
| Resources 3000 m     | Plot: temperature | Intercept     | 0.26     | 0.51  |
|                      |                   | Resources     | 0.01     | 0.08  |
| Resources 2000 m     | Plot: temperature | Intercept     | 0.04     | 0.20  |
|                      |                   | Resources     | 0.02     | 0.16  |
| Resources 1000 m     | Plot: temperature | Intercept     | 0.05     | 0.23  |
|                      |                   | Resources     | <0.01    | 0.06  |
| b) Bird evenness     |                   |               |          |       |
| Temperature 3000 m   | Plot: temperature | Intercept     | <0.01    | 0.01  |
|                      |                   | Temperature   | <0.01    | 0.04  |
| Temperature 2000 m   | Plot: temperature | Intercept     | <0.01    | 0.01  |
|                      |                   | Temperature   | 0.03     | 0.16  |
| Temperature 1000 m   | Plot: temperature | Intercept     | <0.01    | 0.01  |
|                      |                   | Temperature   | <0.01    | <0.01 |
| Precipitation 3000 m | Plot: temperature | Intercept     | <0.01    | 0.04  |
|                      |                   | Precipitation | <0.01    | 0.03  |
| Precipitation 2000 m | Plot: temperature | Intercept     | <0.01    | 0.01  |
|                      |                   | Precipitation | <0.01    | 0.01  |
| Precipitation 1000 m | Plot: temperature | Intercept     | <0.01    | 0.02  |
|                      |                   | Precipitation | <0.01    | 0.02  |

Spatio-temporal dynamics in bird assemblages

|                      |                   |               |       |       |
|----------------------|-------------------|---------------|-------|-------|
| Resources 3000 m     | Plot: temperature | Intercept     | <0.01 | 0.03  |
|                      |                   | Resources     | <0.01 | 0.01  |
| Resources 2000 m     | Plot: temperature | Intercept     | <0.01 | 0.01  |
|                      |                   | Resources     | <0.01 | <0.01 |
| Resources 1000 m     | Plot: temperature | Intercept     | <0.01 | 0.02  |
|                      |                   | Resources     | <0.01 | 0.02  |
| c) Bird richness     |                   |               |       |       |
| Temperature 3000 m   | Plot: temperature | Intercept     | 0.27  | 0.52  |
|                      |                   | Temperature   | 0.18  | 0.43  |
| Temperature 2000 m   | Plot: temperature | Intercept     | 0.05  | 0.22  |
|                      |                   | Temperature   | 0.71  | 0.84  |
| Temperature 1000 m   | Plot: temperature | Intercept     | 0.08  | 0.28  |
|                      |                   | Temperature   | 0.11  | 0.34  |
| Precipitation 3000 m | Plot: temperature | Intercept     | 0.10  | 0.31  |
|                      |                   | Precipitation | <0.01 | 0.05  |
| Precipitation 2000 m | Plot: temperature | Intercept     | 0.02  | 0.13  |
|                      |                   | Precipitation | 0.03  | 0.17  |
| Precipitation 1000 m | Plot: temperature | Intercept     | 0.01  | 0.09  |
|                      |                   | Precipitation | 0.02  | 0.13  |
| Resources 3000 m     | Plot: temperature | Intercept     | 0.06  | 0.25  |
|                      |                   | Resources     | <0.01 | 0.06  |
| Resources 2000 m     | Plot: temperature | Intercept     | 0.03  | 0.18  |
|                      |                   | Resources     | <0.01 | 0.03  |
| Resources 1000 m     | Plot: temperature | Intercept     | 0.02  | 0.14  |
|                      |                   | Resources     | <0.01 | 0.01  |
